# Supplementary material
Source: PubMed Central journal article supplement (PMC10121573)
Supplement: 42003_2023_4814_MOESM1_ESM.pdf [file 42003_2023_4814_MOESM1_ESM.pdf]

## Supplementary Information

### Supplementary Tables

**Supplementary Table 1.** Number (and percentage) of MHV-mapping reads guanylated, uridylated, mono- and oligo-uridylated in each Nanopore sequencing library. All reads passed the poly(A) tail calling quality control and had a confidence interval >0.95 for barcode assignment.

| Cell type | Condition | hpi    | Replicate | Reads  |                |               |                 |                  |             |
|-----------|-----------|--------|-----------|--------|----------------|---------------|-----------------|------------------|-------------|
|           |           |        |           | Total  | Not modified   | Uridylated    | Mono-uridylated | Oligo-uridylated | Guanylated  |
| 17-CL1    | shCTL     | 24     | 1         | 117658 | 98566 (83.77)  | 18024 (15.32) | 13952 (11.86)   | 4072 (3.46)      | 1068 (0.91) |
| 17-CL1    | shCTL     | 24     | 2         | 162052 | 139117 (85.85) | 21427 (13.22) | 17441 (10.76)   | 3986 (2.46)      | 1508 (0.93) |
| 17-CL1    | shCTL     | 24     | 3         | 157142 | 135221 (86.05) | 20617 (13.12) | 16653 (10.6)    | 3964 (2.52)      | 1304 (0.83) |
| 17-CL1    | shTUT47   | 24     | 1         | 36074  | 31329 (86.85)  | 4459 (12.36)  | 3481 (9.65)     | 978 (2.71)       | 286 (0.79)  |
| 17-CL1    | shTUT47   | 24     | 2         | 85240  | 76500 (89.75)  | 7957 (9.33)   | 6687 (7.84)     | 1270 (1.49)      | 783 (0.92)  |
| 17-CL1    | shTUT47   | 24     | 3         | 37730  | 33766 (89.49)  | 3728 (9.88)   | 3181 (8.43)     | 547 (1.45)       | 236 (0.63)  |
| 17-CL1    | shCTL     | 48     | 1         | 26239  | 24529 (93.48)  | 1281 (4.88)   | 1100 (4.19)     | 181 (0.69)       | 429 (1.63)  |
| 17-CL1    | shCTL     | 48     | 2         | 75780  | 70161 (92.59)  | 4770 (6.30)   | 4060 (5.36)     | 710 (0.94)       | 849 (1.12)  |
| 17-CL1    | shCTL     | 48     | 3         | 34228  | 32033 (93.59)  | 1661 (4.85)   | 1438 (4.20)     | 223 (0.65)       | 534 (1.56)  |
| 17-CL1    | shTUT47   | 48     | 1         | 258451 | 227285 (87.94) | 29145 (11.27) | 23194 (8.97)    | 5951 (2.30)      | 2021 (0.78) |
| 17-CL1    | shTUT47   | 48     | 2         | 203310 | 175061 (86.11) | 26798 (13.18) | 21218 (10.44)   | 5580 (2.74)      | 1451 (0.71) |
| 17-CL1    | shTUT47   | 48     | 3         | 380401 | 322079 (84.67) | 54610 (14.35) | 43491 (11.43)   | 11119 (2.92)     | 3712 (0.98) |
| 17-CL1    | WT        | 24     | 1         | 34771  | 31525 (90.66)  | 2975 (8.56)   | 2464 (7.09)     | 511 (1.47)       | 271 (0.78)  |
| 17-CL1    | WT        | 24     | 2         | 32435  | 29312 (90.37)  | 2885 (8.89)   | 2398 (7.39)     | 487 (1.50)       | 238 (0.73)  |
| 17-CL1    | WT        | 24     | 3         | 36368  | 32792 (90.17)  | 3276 (9.01)   | 2725 (7.49)     | 551 (1.52)       | 300 (0.82)  |
| 17-CL1    | WT        | 48     | 1         | 98852  | 89826 (90.87)  | 8255 (8.35)   | 6633 (6.71)     | 1622 (1.64)      | 771 (0.78)  |
| 17-CL1    | WT        | 48     | 2         | 80141  | 72609 (90.60)  | 6944 (8.67)   | 5542 (6.92)     | 1402 (1.75)      | 588 (0.73)  |
| 17-CL1    | WT        | 48     | 3         | 52838  | 47684 (90.25)  | 4759 (9.01)   | 3777 (7.15)     | 982 (1.86)       | 395 (0.75)  |
| NCTC      | WT        | 24     | 1         | 141851 | 116199 (81.92) | 24952 (17.59) | 20639 (14.55)   | 4313 (3.04)      | 700 (0.49)  |
| NCTC      | WT        | 24     | 2         | 110846 | 91662 (82.69)  | 18534 (16.72) | 13941 (12.58)   | 4593 (4.14)      | 650 (0.59)  |
| -         | -         | virion | 1         | 148636 | 132803 (89.35) | 14673 (9.87)  | 12711 (8.55)    | 1962 (1.32)      | 1160 (0.78) |
| -         | -         | virion | 2         | 139067 | 124018 (89.18) | 13870 (9.97)  | 11695 (8.41)    | 2175 (1.56)      | 1179 (0.85) |

**Supplementary Table 2.** Number of total reads, number of reads mapped to the MHV genome, number of reads mapped to endogenous transcripts, number of detected transcripts, and number of detected genes.

| Cell type | Condition | hpi    | Replicate | Reads     |         |            | Transcripts | Genes  |
|-----------|-----------|--------|-----------|-----------|---------|------------|-------------|--------|
|           |           |        |           | Total     | MHV     | Endogenous |             |        |
| 17-CL1    | shCTL     | 0      | 1         | 646,457   | -       | 639,974    | 22,577      | 11,215 |
| 17-CL1    | shCTL     | 0      | 2         | 523,601   | -       | 518,899    | 21,002      | 10,559 |
| 17-CL1    | shCTL     | 0      | 3         | 643,288   | -       | 636,008    | 23,287      | 10,868 |
| 17-CL1    | shTUT47   | 0      | 1         | 646,176   | -       | 639,445    | 22,110      | 10,722 |
| 17-CL1    | shTUT47   | 0      | 2         | 548,125   | -       | 540,775    | 21,394      | 10,446 |
| 17-CL1    | shTUT47   | 0      | 3         | 537,496   | -       | 530,784    | 20,865      | 10,463 |
| 17-CL1    | shCTL     | 24     | 1         | 592,193   | 217,578 | 369,580    | 20,051      | 10,476 |
| 17-CL1    | shCTL     | 24     | 2         | 612,319   | 273,647 | 332,700    | 18,742      | 10,167 |
| 17-CL1    | shCTL     | 24     | 3         | 611,246   | 273,174 | 332,919    | 19,123      | 10,268 |
| 17-CL1    | shTUT47   | 24     | 1         | 673,470   | 65,632  | 601,213    | 20,972      | 10,774 |
| 17-CL1    | shTUT47   | 24     | 2         | 924,736   | 140,970 | 774,977    | 22,297      | 11,107 |
| 17-CL1    | shTUT47   | 24     | 3         | 747,530   | 56,592  | 683,264    | 20,814      | 10,684 |
| 17-CL1    | shCTL     | 48     | 1         | 469,118   | 48,015  | 415,170    | 19,938      | 10,674 |
| 17-CL1    | shCTL     | 48     | 2         | 583,332   | 136,133 | 441,612    | 21,384      | 11,183 |
| 17-CL1    | shCTL     | 48     | 3         | 526,799   | 59,896  | 458,677    | 21,307      | 10,944 |
| 17-CL1    | shTUT47   | 48     | 1         | 647,672   | 416,160 | 227,937    | 14,892      | 9,124  |
| 17-CL1    | shTUT47   | 48     | 2         | 562,834   | 356,786 | 203,603    | 13,997      | 8,851  |
| 17-CL1    | shTUT47   | 48     | 3         | 1,012,718 | 666,790 | 341,599    | 18,640      | 10,295 |
| 17-CL1    | WT        | 24     | 1         | 617,070   | 55,983  | 555,938    | 21,908      | 10,769 |
| 17-CL1    | WT        | 24     | 2         | 597,511   | 53,984  | 538,347    | 21,751      | 10,804 |
| 17-CL1    | WT        | 24     | 3         | 603,117   | 59,382  | 538,849    | 21,359      | 10,761 |
| 17-CL1    | WT        | 48     | 1         | 594,742   | 170,869 | 413,909    | 21,670      | 11,024 |
| 17-CL1    | WT        | 48     | 2         | 555,065   | 148,276 | 397,583    | 21,718      | 10,964 |
| 17-CL1    | WT        | 48     | 3         | 391,943   | 96,738  | 289,102    | 19,542      | 10,524 |
| NCTC      | WT        | 24     | 1         | 434,343   | 257,502 | 173,076    | 16,123      | 9,478  |
| NCTC      | WT        | 24     | 2         | 308,652   | 181,122 | 123,963    | 14,429      | 8,966  |
| -         | -         | virion | 1         | 253,611   | 250,701 | 2,631      | 1,140       | 1,000  |
| -         | -         | virion | 2         | 274,548   | 272,224 | 2,092      | 946         | 817    |

**Supplementary Table 3.** 3' terminal sequences from MHV virion RNAs obtained by RNA circularization. Clones from two independent replicates are shown. Terminal modifications to the poly(A) tail are highlighted in red.

| Replicate | Colony | Sequences                                                                                           |
|-----------|--------|-----------------------------------------------------------------------------------------------------|
| 1         | 1      | CATGGCCAATTGGAAGAATCACAAAAAAAAAAAAAAAAAAAAAAAAAAAAAAAAAAAAAAAAA<br>AAAAAAAAAAAAAAAAAAAAAAAAAAAAAAAA |
| 1         | 2      | CATGGCCAATTGGAAGAATCACAAAAAAAAAAAAAAAAAAAAAAAAAAAAAAAAAAAAAAAAA<br>AAAAAAAAA                        |
| 1         | 3      | CATGGCCAATTGGAAGAATCACAAAAAAAAAAAAAAAAAAAAAAAAAAAAAAAAAAAAAAAAA<br>AAA                              |
| 1         | 4      | CATGGCCAATTGGAAGAATCACAAAAAAAAAAAAAAAAAAAAAAAAAAAAAAAAAAAAAAAAA<br>AA                               |
| 1         | 5      | CATGGCCAATTGGAAGAATCACAAAAAAAAAAAAAAAAAAAAAAAAAAAAAAAAAAAAA                                         |
| 1         | 6      | CATGGCCAATTGGAAGAATCACAAAAAAAAAAAAAAAAAAAAAAAAAAAAAAAAAAAAA                                         |
| 1         | 7      | CATGGCCAATTGGAAGAATCACAAAAAAAAAAAAAAAAAAAAAAAAAAAAAAAAAAAA <b>TTT</b>                               |
| 1         | 8      | CATGGCCAATTGGAAGAATCACAAAAAAAAAAAAAAAAAAAAAAAAAAAAA                                                 |
| 1         | 9      | CATGGCCAATTGGAAGAATCACAAAAAAAAAAAAAAAAAAAAAAAAAAAA <b>TT</b>                                        |
| 1         | 10     | CATGGCCAATTGGAAGAATCACAAAAAAAAAAAAAAAAAAAAA                                                         |
| 1         | 11     | CATGGCCAATTGGAAGAATCACAAAAAAAAAAAAA                                                                 |
| 1         | 12     | CATGGCCAATTGGAAGAATCACAAAAAAAAAAAAA                                                                 |
| 1         | 13     | CATGGCCAATTGGAAGAATCACAAAAAAAAAAAAA                                                                 |
| 1         | 14     | CATGGCCAATTGGAAGAATCACAAAAAAAAAAAA <b>T</b>                                                         |
| 1         | 15     | CATGGCCAATTGGAAGAATCACAAAAAAAAAAAA                                                                  |
| 1         | 16     | CATGGCCAATTGGAAGAATCACAAAAAAAAAAAA                                                                  |
| 2         | 1      | CNNGNCCAATTGGAAGANTCNCAAAAAAAAAAAAAAAAAAAAAAAAAAAAAAAAAAAAAA                                        |
| 2         | 2      | NNGNCCANTNGGAAGAATCNCAAAAAAAAAAAAAAAAAAAAAAAAAAAAAAAAAAAAAA                                         |
| 2         | 3      | CATGGCCAATTGGAAGAATCACAAAAAAAAAAAAAAAAAAAAA                                                         |
| 2         | 4      | CATGGCCAATTGGAAGAATCACAAAAAAAAAAAAAAAAAAAA <b>TT</b>                                                |
| 2         | 5      | CATGGCCAATTGGAAGAATCACAAAAAAAAAAAAAAAAAAAA <b>TTT</b>                                               |
| 2         | 6      | CATGGCCAATTGGAAGAATCACAAAAAAAAAAAAA                                                                 |
| 2         | 7      | CATGGCCAATTGGAAGAATCACAAAAAAAAAAAA <b>TTTTTA</b>                                                    |
| 2         | 8      | CATGGCCAATTGGAAGAATCACAAAAAAAAAAAAA                                                                 |
| 2         | 9      | CATGGCCAATTGGAAGAATCACAAAAAAAAAAAAA                                                                 |
| 2         | 10     | CATGGCCAATTGGAAGAATCACAAAAAAAAAAAAA                                                                 |
| 2         | 11     | CATGGCCAATTGGAAGAATCACAAAAAAAAAAAAA                                                                 |
| 2         | 12     | CATGGCCAATTGGAAGAATCACAAAAAAAAAAAAA                                                                 |

**Supplementary Table 4.** Mean percentages of non-modified poly(A) tails, mono-uridylated tails, oligo-uridylated tails, and guanylated tails for the different libraries generated split by MHV RNA species.

| Condition | hpi | sgRNA  | % of reads   |            |                 |                  |            |
|-----------|-----|--------|--------------|------------|-----------------|------------------|------------|
|           |     |        | Not modified | Uridylated | Mono-uridylated | Oligo-uridylated | Guanylated |
| shCTL     | 24  | E      | 85.0         | 14.0       | 11.2            | 2.8              | 1.0        |
| shCTL     | 24  | M      | 83.1         | 16.0       | 12.8            | 3.2              | 0.9        |
| shCTL     | 24  | N      | 85.5         | 13.5       | 10.3            | 3.3              | 1.0        |
| shCTL     | 24  | gRNA/S | 86.6         | 12.4       | 10.2            | 2.2              | 1.0        |
| shCTL     | 48  | E      | 92.2         | 6.3        | 5.3             | 1.0              | 1.5        |
| shCTL     | 48  | M      | 91.2         | 7.2        | 6.2             | 1.1              | 1.6        |
| shCTL     | 48  | N      | 93.1         | 5.3        | 4.3             | 1.0              | 1.6        |
| shCTL     | 48  | gRNA/S | 93.8         | 4.7        | 3.9             | 0.8              | 1.6        |
| shTUT47   | 24  | E      | 88.4         | 10.8       | 8.7             | 2.1              | 0.8        |
| shTUT47   | 24  | M      | 87.5         | 11.7       | 9.7             | 2.0              | 0.9        |
| shTUT47   | 24  | N      | 88.5         | 10.6       | 8.2             | 2.4              | 0.9        |
| shTUT47   | 24  | gRNA/S | 90.2         | 9.3        | 7.7             | 1.6              | 0.6        |
| shTUT47   | 48  | E      | 84.5         | 14.6       | 11.6            | 3.0              | 1.0        |
| shTUT47   | 48  | M      | 85.0         | 14.1       | 11.2            | 2.9              | 1.0        |
| shTUT47   | 48  | N      | 86.4         | 12.7       | 9.5             | 3.2              | 0.9        |
| shTUT47   | 48  | gRNA/S | 86.3         | 12.8       | 10.1            | 2.7              | 0.9        |
| WT_24     | 24  | E      | 90.0         | 9.2        | 7.5             | 1.7              | 0.8        |
| WT_24     | 24  | M      | 88.6         | 10.5       | 8.7             | 1.8              | 0.9        |
| WT_24     | 24  | N      | 90.4         | 8.8        | 6.9             | 1.9              | 0.8        |
| WT_24     | 24  | gRNA/S | 91.8         | 7.6        | 6.0             | 1.5              | 0.6        |
| WT_48     | 48  | E      | 89.4         | 9.7        | 7.8             | 2.0              | 0.8        |
| WT_48     | 48  | M      | 88.4         | 10.9       | 8.7             | 2.2              | 0.7        |
| WT_48     | 48  | N      | 90.5         | 8.6        | 6.5             | 2.1              | 0.9        |
| WT_48     | 48  | gRNA/S | 91.1         | 8.2        | 6.6             | 1.5              | 0.7        |

**Supplementary Table 5.** Number (and percentage) of guanylated, uridylated, mono- and oligo-uridylated reads mapping to endogenous transcripts in each Nanopore sequencing library. All reads passed the poly(A) tail calling quality control and had a confidence interval >0.95 for barcode assignment.

| Cell type | Condition | hpi    | Replicate | Reads  |                |              |                 |                  |             |
|-----------|-----------|--------|-----------|--------|----------------|--------------|-----------------|------------------|-------------|
|           |           |        |           | Total  | Not modified   | Uridylated   | Mono-uridylated | Oligo-uridylated | Guanylated  |
| 17-CL1    | shCTL     | 0      | 1         | 391902 | 374200 (95.48) | 12594 (3.22) | 9900 (2.53)     | 2694 (0.69)      | 5108 (1.30) |
| 17-CL1    | shCTL     | 0      | 2         | 314470 | 300820 (95.66) | 9646 (3.07)  | 7489 (2.38)     | 2157 (0.69)      | 4004 (1.27) |
| 17-CL1    | shCTL     | 0      | 3         | 388828 | 373097 (95.95) | 11662 (3.00) | 8946 (2.30)     | 2716 (0.70)      | 4069 (1.05) |
| 17-CL1    | shTUT47   | 0      | 1         | 397321 | 383328 (96.48) | 10521 (2.65) | 8217 (2.07)     | 2304 (0.58)      | 3472 (0.87) |
| 17-CL1    | shTUT47   | 0      | 2         | 329734 | 314863 (95.49) | 10214 (3.10) | 8104 (2.46)     | 2110 (0.64)      | 4657 (1.41) |
| 17-CL1    | shTUT47   | 0      | 3         | 326677 | 314084 (96.15) | 8875 (2.71)  | 6808 (2.08)     | 2067 (0.63)      | 3718 (1.14) |
| 17-CL1    | shCTL     | 24     | 1         | 207615 | 197319 (95.04) | 7884 (3.80)  | 5897 (2.84)     | 1987 (0.96)      | 2412 (1.16) |
| 17-CL1    | shCTL     | 24     | 2         | 201026 | 191383 (95.20) | 7441 (3.70)  | 5919 (2.94)     | 1522 (0.76)      | 2202 (1.10) |
| 17-CL1    | shCTL     | 24     | 3         | 195958 | 186586 (95.22) | 7196 (3.67)  | 5640 (2.88)     | 1556 (0.79)      | 2176 (1.11) |
| 17-CL1    | shTUT47   | 24     | 1         | 345721 | 331209 (95.80) | 11083 (3.20) | 8480 (2.45)     | 2603 (0.75)      | 3429 (0.99) |
| 17-CL1    | shTUT47   | 24     | 2         | 490793 | 472195 (96.21) | 13529 (2.76) | 10642 (2.17)    | 2887 (0.59)      | 5069 (1.03) |
| 17-CL1    | shTUT47   | 24     | 3         | 448858 | 432904 (96.45) | 12396 (2.76) | 9828 (2.19)     | 2568 (0.57)      | 3558 (0.79) |
| 17-CL1    | shCTL     | 48     | 1         | 240297 | 228983 (95.29) | 7261 (3.03)  | 5614 (2.34)     | 1647 (0.69)      | 4053 (1.69) |
| 17-CL1    | shCTL     | 48     | 2         | 262037 | 252650 (96.42) | 6673 (2.55)  | 5056 (1.93)     | 1617 (0.62)      | 2714 (1.04) |
| 17-CL1    | shCTL     | 48     | 3         | 275316 | 263304 (95.64) | 7711 (2.80)  | 5977 (2.17)     | 1734 (0.63)      | 4301 (1.56) |
| 17-CL1    | shTUT47   | 48     | 1         | 143479 | 139176 (97.00) | 3093 (2.16)  | 2194 (1.53)     | 899 (0.63)       | 1210 (0.84) |
| 17-CL1    | shTUT47   | 48     | 2         | 121456 | 117493 (96.74) | 2918 (2.41)  | 1986 (1.64)     | 932 (0.77)       | 1045 (0.86) |
| 17-CL1    | shTUT47   | 48     | 3         | 208083 | 199547 (95.90) | 6338 (3.05)  | 4263 (2.05)     | 2075 (1.00)      | 2198 (1.06) |
| 17-CL1    | WT        | 24     | 1         | 343472 | 326936 (95.19) | 13306 (3.87) | 10559 (3.07)    | 2747 (0.80)      | 3230 (0.94) |
| 17-CL1    | WT        | 24     | 2         | 323707 | 308026 (95.16) | 12592 (3.89) | 9880 (3.05)     | 2712 (0.84)      | 3089 (0.95) |
| 17-CL1    | WT        | 24     | 3         | 333127 | 317163 (95.21) | 12805 (3.84) | 10069 (3.02)    | 2736 (0.82)      | 3159 (0.95) |
| 17-CL1    | WT        | 48     | 1         | 248190 | 237404 (95.65) | 8769 (3.53)  | 6796 (2.74)     | 1973 (0.79)      | 2017 (0.81) |
| 17-CL1    | WT        | 48     | 2         | 228246 | 217702 (95.38) | 8504 (3.72)  | 6462 (2.83)     | 2042 (0.89)      | 2040 (0.89) |
| 17-CL1    | WT        | 48     | 3         | 171741 | 163958 (95.47) | 6351 (3.70)  | 4739 (2.76)     | 1612 (0.94)      | 1432 (0.83) |
| NCTC      | WT        | 24     | 1         | 88783  | 83573 (94.13)  | 4470 (5.03)  | 3297 (3.71)     | 1173 (1.32)      | 740 (0.83)  |
| NCTC      | WT        | 24     | 2         | 68508  | 64855 (94.67)  | 3032 (4.43)  | 2219 (3.24)     | 813 (1.19)       | 621 (0.91)  |
| -         | -         | virion | 1         | 1471   | 1375 (93.47)   | 88 (5.98)    | 75 (5.10)       | 13 (0.88)        | 8 (0.54)    |
| -         | -         | virion | 2         | 1032   | 966 (93.60)    | 55 (5.33)    | 42 (4.07)       | 13 (1.26)        | 11 (1.07)   |

**Supplementary Table 6.** shRNA vectors for generating 17-CL1 lentiviral stable cell lines.

| Cell line name  | Known-down target gene      | shRNA sense sequences                                      |
|-----------------|-----------------------------|------------------------------------------------------------|
| 17-CL1 shCTL    | Non-target                  | shCTL: ATCTCGCTTGGGCGAGAGTAAG                              |
| 17-CL1 shTUT4/7 | <i>Tut4</i> and <i>Tut7</i> | shTut4: GAGGAAACGTGTCCGAGTA<br>shTut7: AGGATTTTCCAGGAACTAA |

**Supplementary Table 7.** qPCR primers.

| Gene ID      | Forward primer        | Reverse primer          |
|--------------|-----------------------|-------------------------|
| <i>Tut4</i>  | AAGTCAGAAATTGGGACCAGC | TGGCAGCGTTTACTTTACATGAT |
| <i>Tut7</i>  | TGGTCTGGGAATACACTGACA | AACTCTAAAGCATAGAACCGCAG |
| <i>Gapdh</i> | AATGGATTTGGACGCATTGGT | TTTGCCTGGTACGTGTTGAT    |

**Supplementary Table 8.** Oligos used to generate spike-ins of different poly(A) tail lengths.

| Oligo name     | Oligo sequence                                      |
|----------------|-----------------------------------------------------|
| RNA-Spike_Frw  | CGTCGAGGAGTAATACGACTCACTATAGAATCCTGGCCAGTGAGCAA     |
| RNA-Spike_8    | T(8)GGCACAGTCGGCACATACACGCTCACAGGCTGATCAGCGAGCTCTA  |
| RNA-Spike_16   | T(16)GGCACAGTCGGCTCGTCGCGCACAAGGCTGATCAGCGAGCTCTA   |
| RNA-Spike_32   | T(32)GGCACAGTCGACAGTGCCTGTCTATAGGCTGATCAGCGAGCTCTA  |
| RNA-Spike_64_a | T(64)GGCACAGTCGTCACACTCTAGAGCGAAGGCTGATCAGCGAGCTCTA |
| RNA-Spike_64_b | GGCACAGTCGCGCTGCGAGAGACAGTAGGCTGATCAGCGAGCTCTA      |
| RNA-Spike_100  | GGCACAGTCGATGACAGTGCTCAGTGAGGCTGATCAGCGAGCTCTA      |

**Supplementary Table 9.** Splint ligation oligos for direct RNA-seq library preparation.

| Oligo name | Oligo sequence                                        | Barcode | Percent amount |
|------------|-------------------------------------------------------|---------|----------------|
| Oligo 1F   | /5Phos/GGCTTCTTCTTGCTCTTAGGTAGTAGGTTTC                | BC-1    | 90%            |
| Oligo 1R   | GAGGCGAGCGGTCAATTTTCTAAGAGCAAGAAGAAGCCTTTTT<br>TTTTT  |         |                |
| Oligo 2F   | /5Phos/GTGATTCTCGTCTTTCTGCGTAGTAGGTTTC                | BC-2    | 3%             |
| Oligo 2R   | GAGGCGAGCGGTCAATTTTCGCAGAAAGACGAGAATCACATTTT<br>TTTTT |         |                |
| Oligo 3F   | /5Phos/GTACTTTTCTCTTTGCGCGGTAGTAGGTTTC                | BC-3    | 2.40%          |
| Oligo 3R   | GAGGCGAGCGGTCAATTTTCCGCGCAAAGAGAAAAGTACAATTT<br>TTTTT |         |                |
| Oligo 4F   | /5Phos/GTACTTTTCTCTTTGCGCGGTAGTAGGTTTC                | BC-3    | 0.45%          |
| Oligo 4R   | GAGGCGAGCGGTCAATTTTCCGCGCAAAGAGAAAAGTACAATTT<br>TTTTT |         |                |
| Oligo 5F   | /5Phos/GTACTTTTCTCTTTGCGCGGTAGTAGGTTTC                | BC-3    | 0.08%          |

|           |                                                       |      |       |
|-----------|-------------------------------------------------------|------|-------|
| Oligo 5R  | GAGGCGAGCGGTCAATTTTCCGCGCAAAGAGAAAAGTACAAAAT<br>TTTTT |      |       |
| Oligo 6F  | /5Phos/GTACTTTTCTCTTTGCGCGGTAGTAGGTTC                 | BC-3 | 0.08% |
| Oligo 6R  | GAGGCGAGCGGTCAATTTTCCGCGCAAAGAGAAAAGTACAAA<br>ATTTTT  |      |       |
| Oligo 7F  | /5Phos/GGTCTTCGCTCGGTCTTATTTAGTAGGTTC                 | BC-4 | 3%    |
| Oligo 7R  | GAGGCGAGCGGTCAATTTTAATAAGACCGAGCGAAGACCCTTT<br>TTTTT  |      |       |
| Oligo 8F  | /5Phos/GGTCTTCGCTCGGTCTTATTTAGTAGGTTC                 | BC-4 | 0.75% |
| Oligo 8R  | GAGGCGAGCGGTCAATTTTAATAAGACCGAGCGAAGACCCTTT<br>TTTTT  |      |       |
| Oligo 9F  | /5Phos/GGTCTTCGCTCGGTCTTATTTAGTAGGTTC                 | BC-4 | 0.20% |
| Oligo 9R  | GAGGCGAGCGGTCAATTTTAATAAGACCGAGCGAAGACCTTCTT<br>TTTTT |      |       |
| Oligo 10F | /5Phos/GGTCTTCGCTCGGTCTTATTTAGTAGGTTC                 | BC-4 | 0.05% |
| Oligo 10R | GAGGCGAGCGGTCAATTTTAATAAGACCGAGCGAAGACCTTCT<br>TTTTT  |      |       |





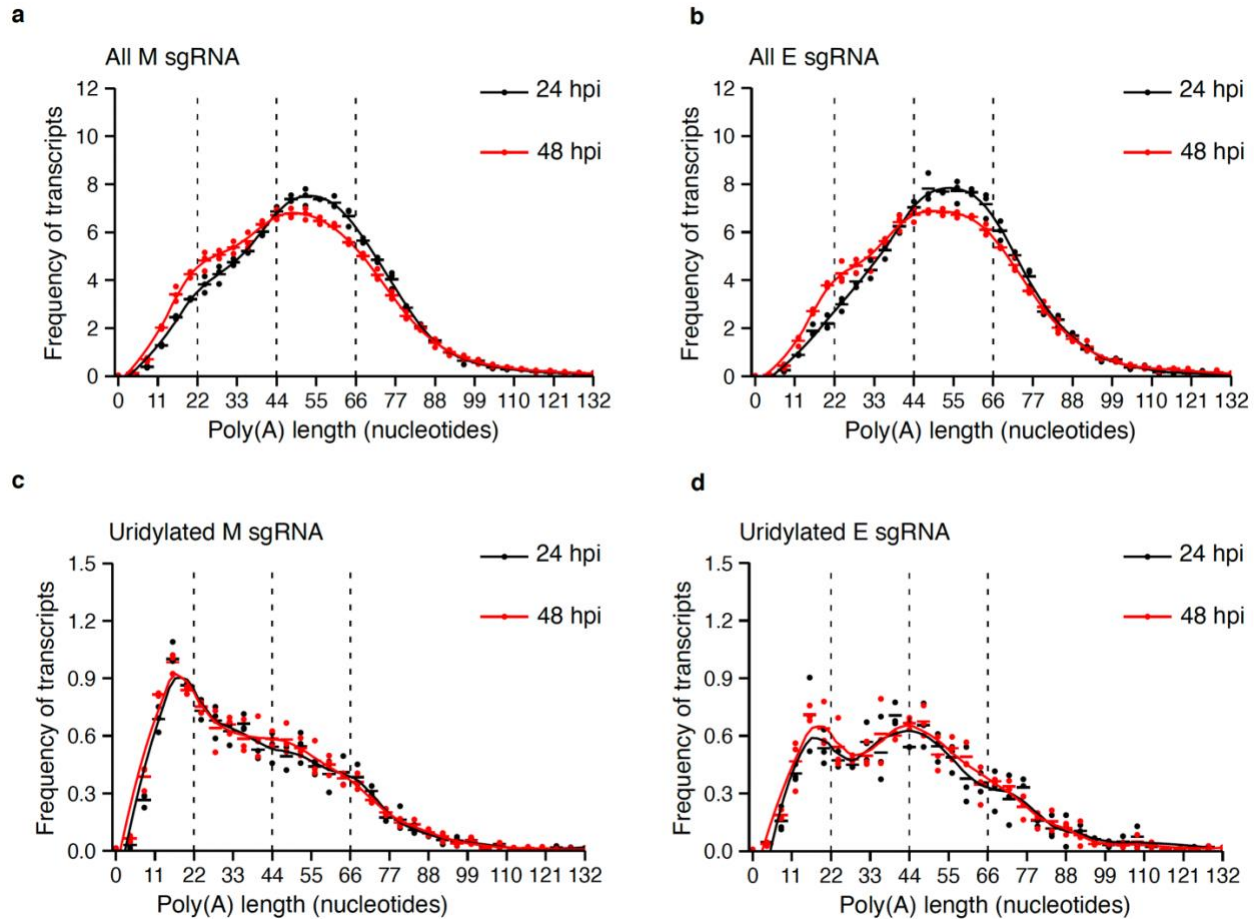

**Supplementary Fig. 2. M and E sgRNAs with poly(A) tails shorter than ~22 nucleotides are uridylated.** (a-b) The poly(A) tail length profiles of the M sgRNA (a) or E sgRNA (b) from 17-CL1 infected cells at 24 and 48 hours post-infection (hpi) are depicted in black and red, respectively. (c) The uridylation profiles of the M sgRNA from 17-CL1 infected cells at 24 hpi (black) and 48 hpi (red) are shown. Uridylated reads represent 10.5% and 10.9% of total reads at 24 hpi and 48 hpi, respectively. (d) The uridylation profiles of the E sgRNA from 17-CL1 infected cells at 24 hpi (black) and 48 hpi (red) are shown. Uridylated reads represent 9.2% and 9.7% of total reads at 24 hpi and 48 hpi, respectively. Dots represent the frequency of poly(A) tail length for each sample, and the horizontal bars show the mean frequency of poly(A) tail length per condition (n=3 for all conditions).

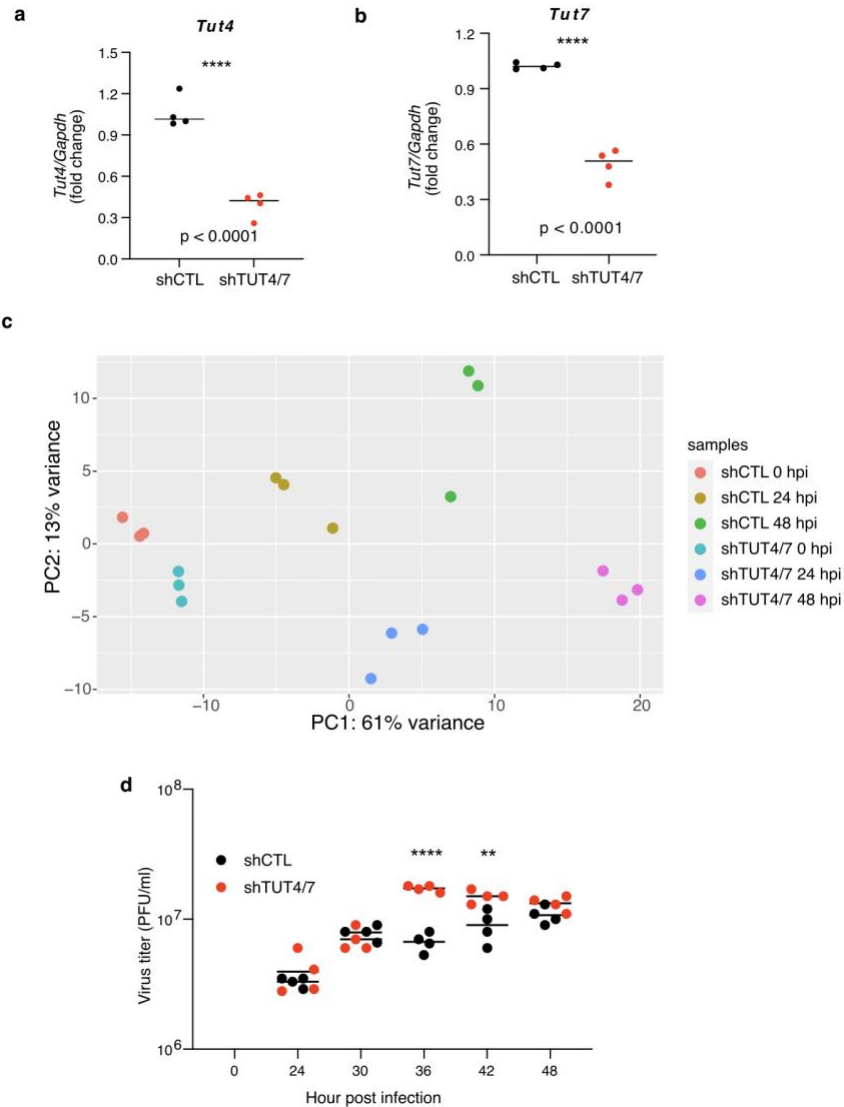

**Supplementary Fig. 3. Transcriptomic signature of shCTL and shTUT4/7 cell lines before and during infection.** (a, b) The relative expression of *Tut4* (a) and *Tut7* (b) transcripts between shCTL and shTUT4/7 cells as determined by qPCR is shown. Mouse *Gapdh* was used as an internal control. (c) A principal component analysis (PCA) plot from shCTL and shTUT4/7 triplicates before infection, at 24 hpi and 48 hours post-infection (hpi), is shown. Different samples are indicated in different colors. (d) The quantification of viral particles in the supernatant of MHV-infected shCTL and shTUT4/7 cells using plaque assay is shown for different time points (0, 24, 30, 36, 42, and 48 hpi). Virus quantification from shCTL and shTUT4/7 samples are indicated in black and red, respectively. Each dot represents one biological replicate ( $n = 4$ ), and the bars indicate the mean value for each condition at every time point (Two-way ANOVA; \*\*\*\*,  $p < 0.0001$ ; \*\*  $p < 0.01$ ).

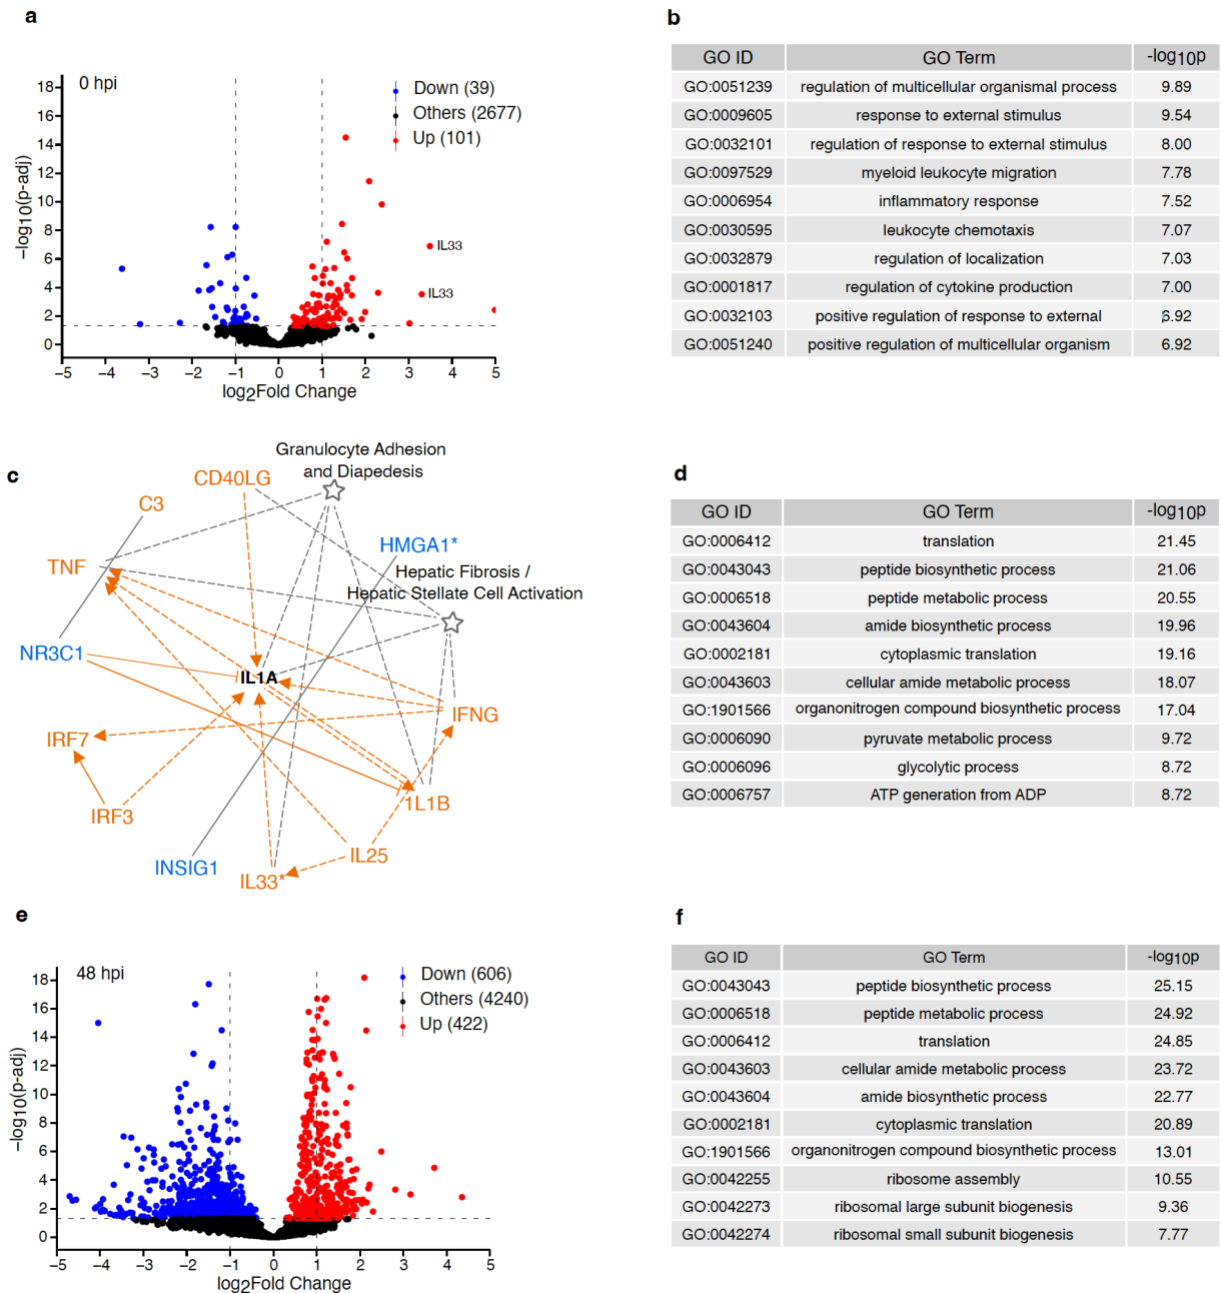

**Supplementary Fig. 4. Gene ontology and pathway analysis of differentially expressed transcripts between control and TUT4/7-depleted cells. (a)** Volcano plot showing the differential gene expression between shCTL and shTUT4/7 cells before infection. Significantly up-regulated genes are indicated in red, and significantly down-regulated genes in blue (adjusted p-value < 0.05, n=3). **(b)** Table showing the ten most significantly enriched GO categories with

their GO IDs and p-values for upregulated transcripts in shTUT4/7 cells before infection. **(c)** A graphical summary of Ingenuity Pathway Analysis (IPA) of differentially expressed transcripts upon TUT4/7 depletion before infection is shown with upregulated pathways indicated in orange and downregulated in blue. Canonical pathways are indicated with stars. Direct and indirect interactions are indicated by full and dotted lines, respectively. **(d)** Table showing the ten most significantly enriched GO categories with their GO IDs and p-values for upregulated transcripts in shTUT4/7 cells at 24 hours post-infection (hpi) as in (b). **(e)** Volcano plot showing the differential gene expression between shCTL and shTUT4/7 cells at 48 hpi as in (a). **(f)** Table showing the ten most significantly enriched GO categories with their GO IDs and p-values for upregulated transcripts in shTUT4/7 cells at 48 hpi.

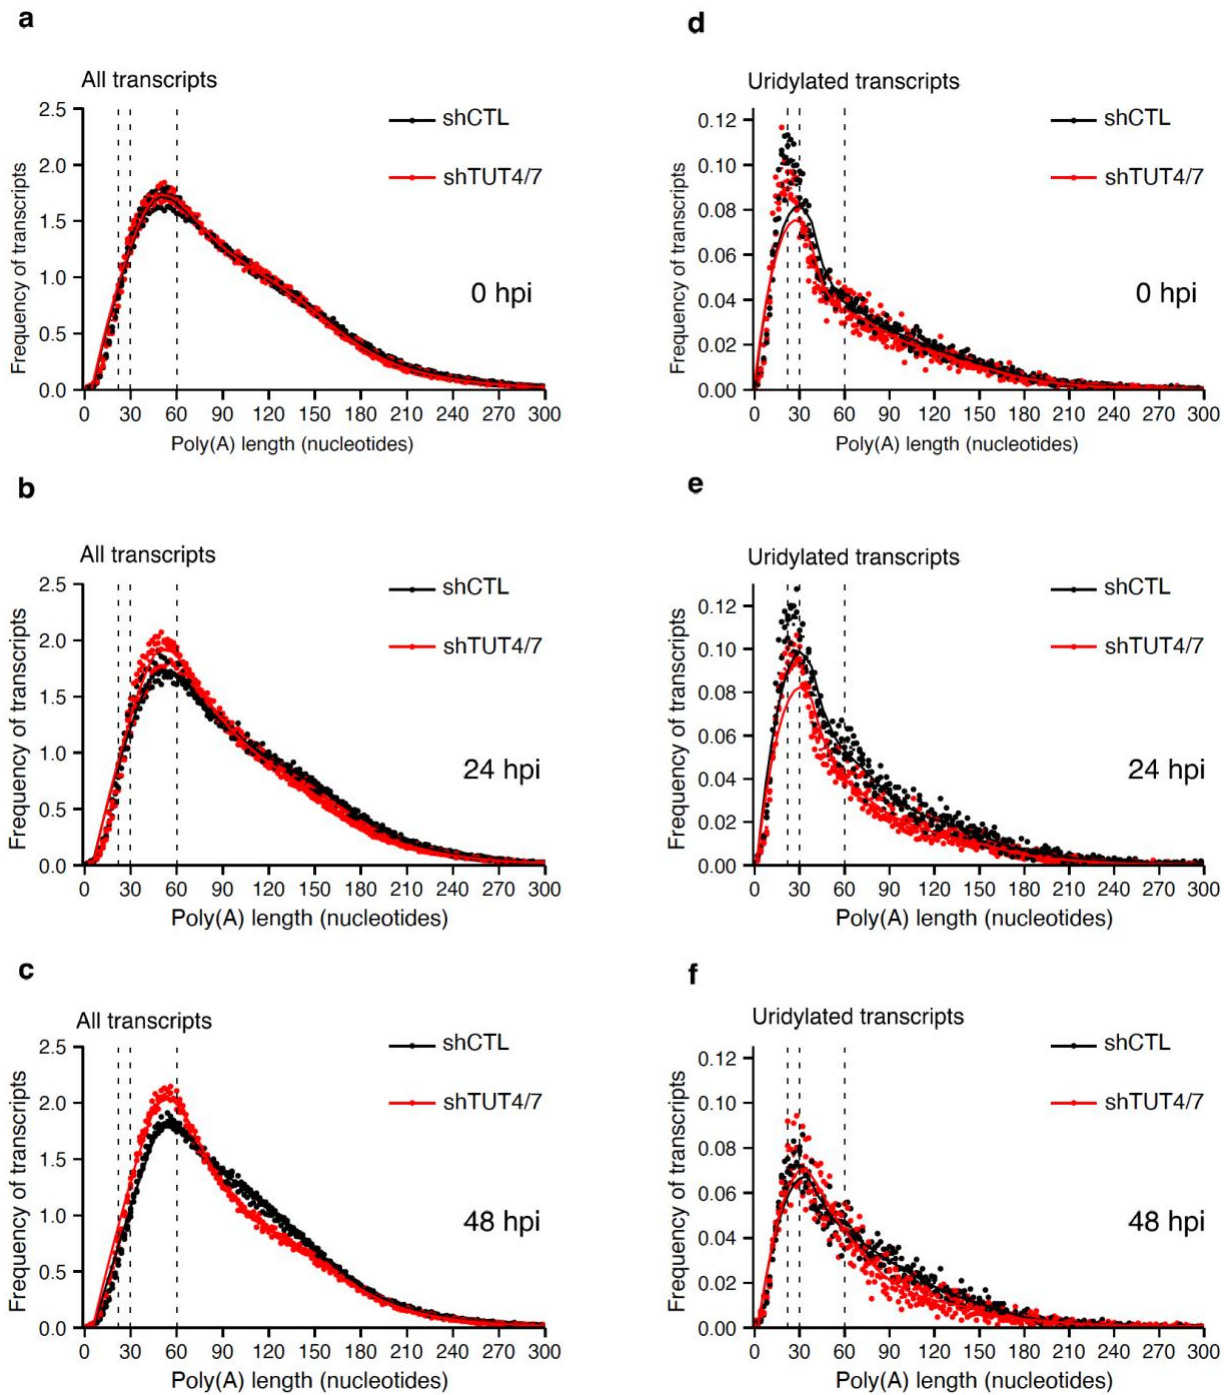

**Supplementary Fig. 5. Poly(A) tail length profiles of all and terminal uridylated endogenous transcripts from shCTL and shTUT4/7 cell lines. (a, c)** The poly(A) tail length profiles of endogenous transcripts from shCTL (black) and shTUT4/7 (red) cells before infection (**a**), at 24 hours post-infection (hpi) (**b**) and 48 hpi (**c**), are shown. (**d**) The poly(A) tail length profiles of terminally uridylated endogenous transcripts from shCTL (black) and shTUT4/7 (red) cells before

infection are shown. Uridylated reads represent 3.1% and 2.8% of total reads in shCTL and shTUT4/7 cells, respectively. **(e)** The poly(A) tail length profiles of terminally uridylated endogenous transcripts from shCTL (black) and shTUT4/7 (red) infected cells at 24 hpi are shown. Uridylated reads represent 3.7% and 2.9% of total reads in shCTL and shTUT4/7 cells, respectively. **(f)** The poly(A) tail length profiles of terminally uridylated endogenous transcripts from shCTL (black) and shTUT4/7 (red) infected cells at 48 hpi are shown. Uridylated reads represent 2.8% and 2.5% of total reads in shCTL and shTUT4/7 cells, respectively. Dots represent the frequency of poly(A) tail length for each sample, and the horizontal bars show the mean frequency of poly(A) tail length per condition (n=3 for all conditions).

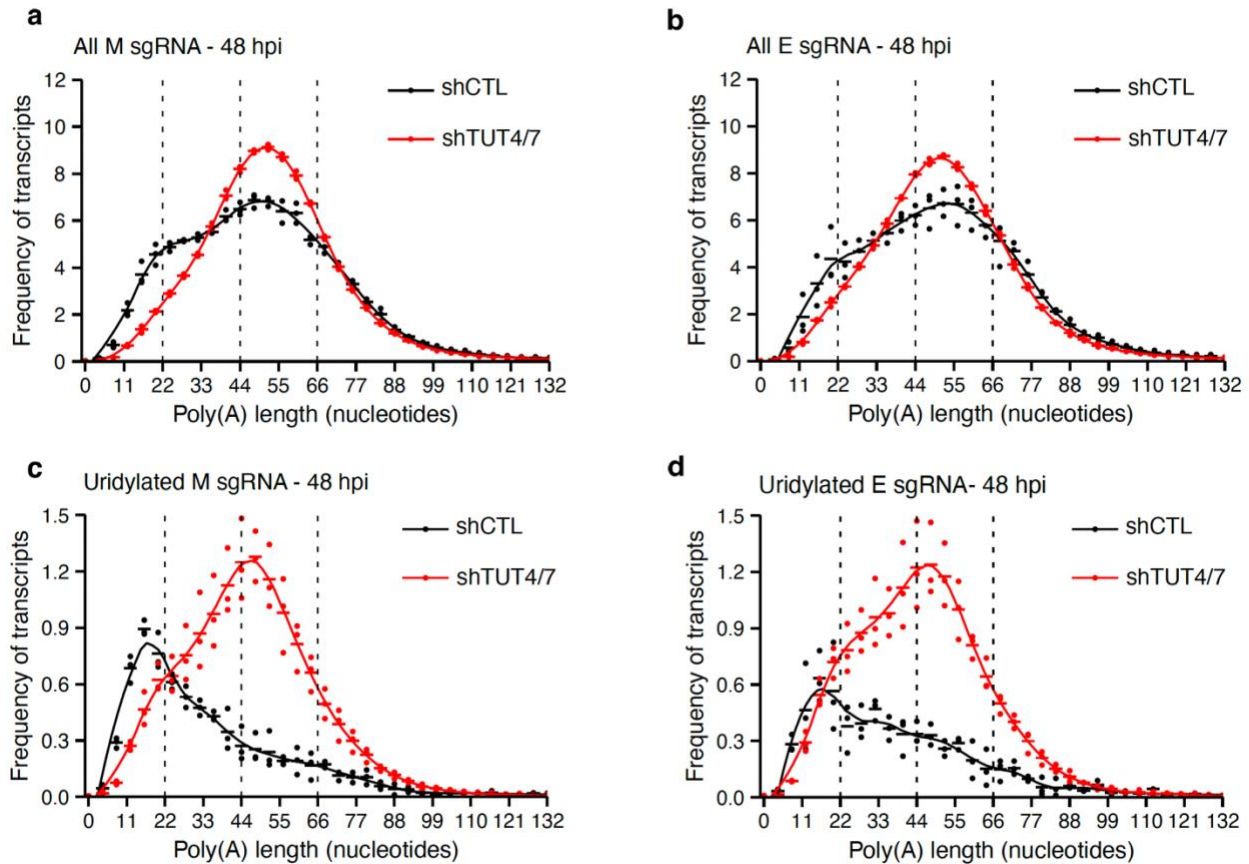

**Supplementary Fig. 6. TUT4/7 alter the uridylation profiles of the M and E sgRNAs at 48 hpi.** (a-b) The poly(A) tail profile of the M sgRNA (a) and E sgRNA (b) from shCTL (black) and shTUT4/7 (red) infected cells at 48 hours post-infection (hpi). (c) The poly(A) tail length profiles of terminally uridylated M sgRNA from shCTL (black) and shTUT4/7 (red) infected cells are shown. Uridylated reads represent 7.2% and 14.1% of total reads in shCTL and shTUT4/7 cells, respectively. (d) The poly(A) tail length profiles of terminally uridylated E sgRNA from shCTL (black) and shTUT4/7 (red) infected cells are shown. Uridylated reads represent 6.3% and 14.6% of total reads in shCTL and shTUT4/7 cells, respectively. Dots indicate the frequency of poly(A) tail length for each sample, and the horizontal bars show the mean frequency of poly(A) tail length per condition (n=3 for all conditions).

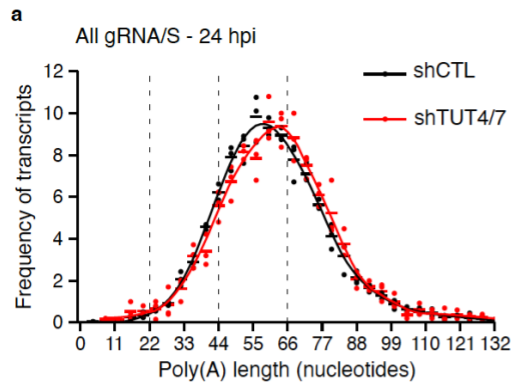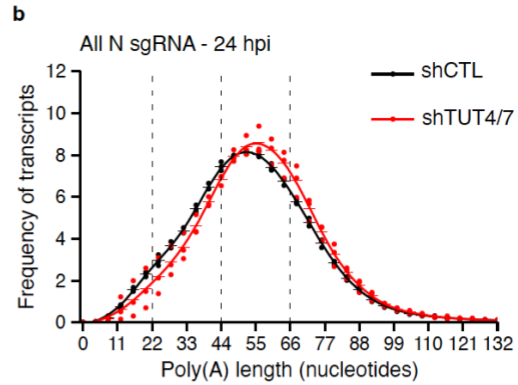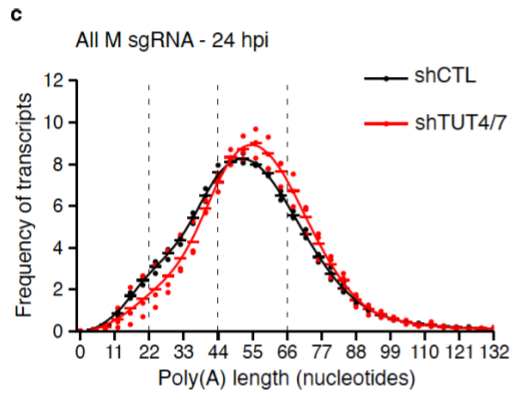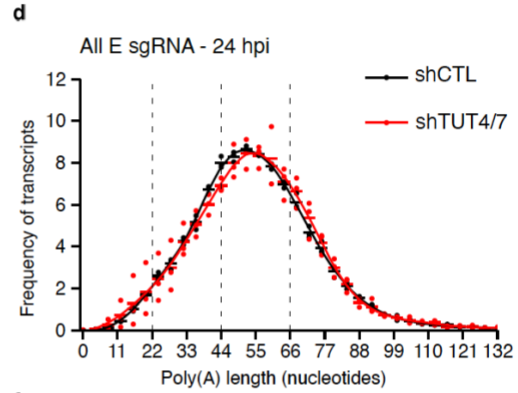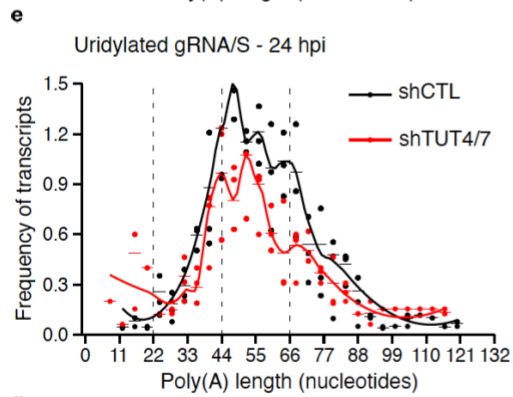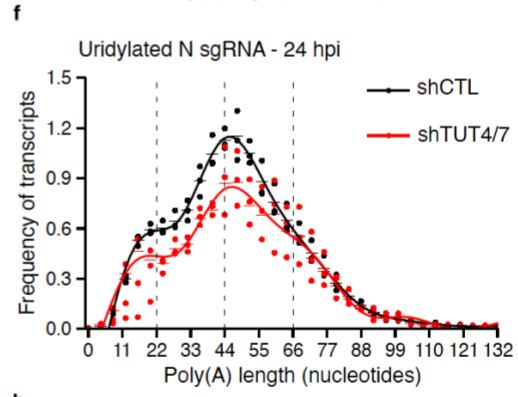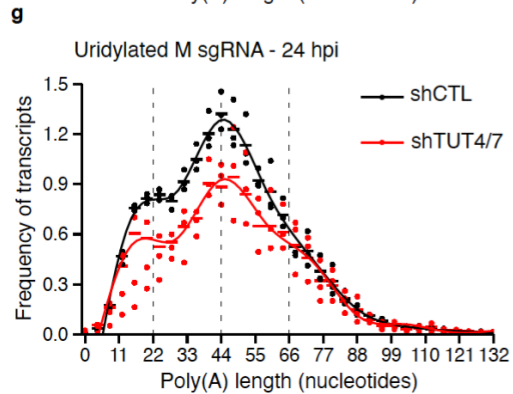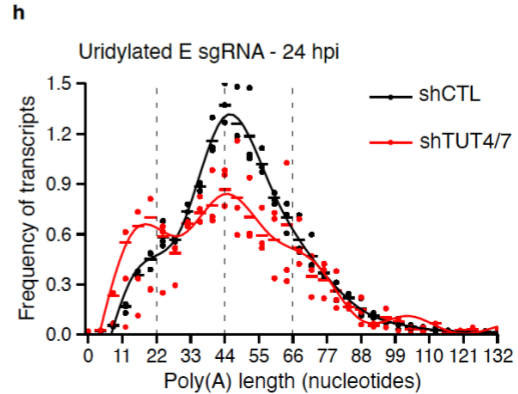



**Supplementary Fig. 7. TUT4/7 do not affect the poly(A) profile of uridylated sgRNAs at 24 hpi. (a-d)** The poly(A) tail profiles of the gRNA/S (a), N sgRNA (b), M sgRNA (c), and E sgRNA (d) from shCTL (black) and shTUT4/7 (red) infected cells at 24 hours post-infection (hpi) are shown. (e) The poly(A) tail length profiles of terminally uridylated gRNA/S from shCTL (black) and shTUT4/7 (red) infected cells are shown. Uridylated reads represent 12.4% and 9.3% of total reads in shCTL and shTUT4/7 cells, respectively. (f) The poly(A) tail length profiles of terminally uridylated N sgRNA from shCTL (black) and shTUT4/7 (red) infected cells are shown. Uridylated reads represent 13.5% and 10.6% of total reads in shCTL and shTUT4/7 cells, respectively. (g) The poly(A) tail length profiles of terminally uridylated M sgRNA from shCTL (black) and shTUT4/7 (red) infected cells are shown. Uridylated reads represent 16.0% and 11.7% of total reads in shCTL and shTUT4/7 cells, respectively. (h) The poly(A) tail length profiles of terminally uridylated E sgRNA from shCTL (black) and shTUT4/7 (red) infected cells are shown. Uridylated reads represent 14.0% and 10.8% of total reads in shCTL and shTUT4/7 cells, respectively. Dots indicate the frequency of poly(A) tail length for each sample, and the horizontal bars show the mean frequency of poly(A) tail length per condition (n=3 for all conditions).
