# Supplementary material
Source: PubMed Central journal article supplement (PMC10121573)
Supplement: 42003_2023_4814_MOESM2_ESM.pdf [file 42003_2023_4814_MOESM2_ESM.pdf]

## Description of Additional Supplementary Files

**File name:** Supplementary Data 1

**Description:** The source data behind Figure 3b
